# Supplementary material for: A simple approach based on transmetalation for the selective and sensitive colorimetric/fluorometric detection of copper(ii) ions in drinking water
Source: Royal Society of Chemistry journal article supplement (doi:10.1039/d2nj03695a), 2022-01-01
Supplement: d2nj03695a1.pdf [file d2nj03695a1.pdf]

# **Electronic Supplementary Information**

## **A simple approach based on transmetalation for the selective and sensitive colorimetric/fluorometric detection of copper(II) ions in drinking water**

Ivan Pietro Oliveri, Gabriella Munzi, and Santo Di Bella \*

*Dipartimento di Scienze Chimiche, Università di Catania, I-95125 Catania, Italy*

*E-mail: [sdibella@unict.it](mailto:sdibella@unict.it)*

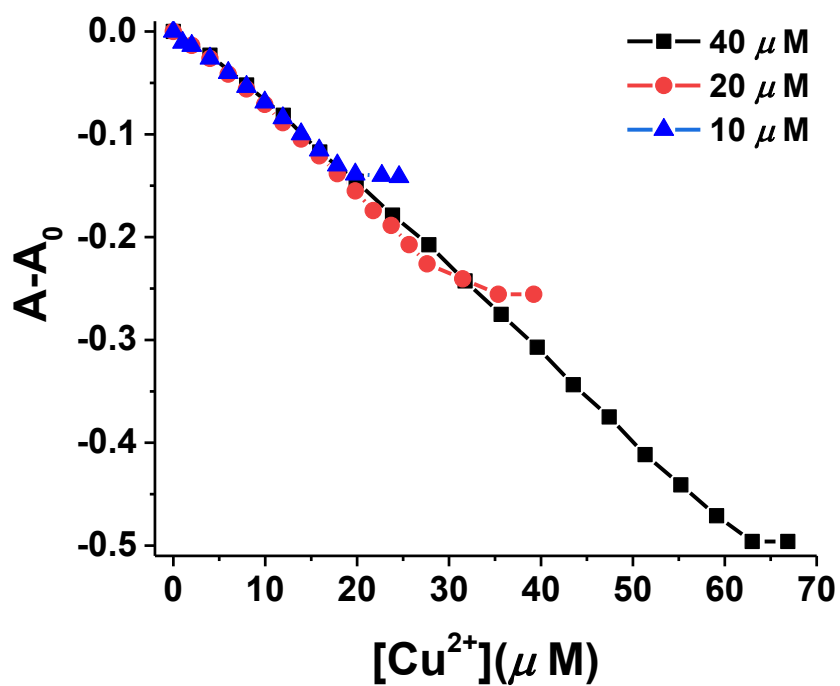

**Fig. S1** Spectrophotometric titrations of **1** (MeCN solutions at different concentration) with  $Cu^{2+}$  (as aqueous solutions of the perchlorate salt). Variation of the absorbance at 568 nm as a function of the concentration of  $Cu^{2+}$  added.

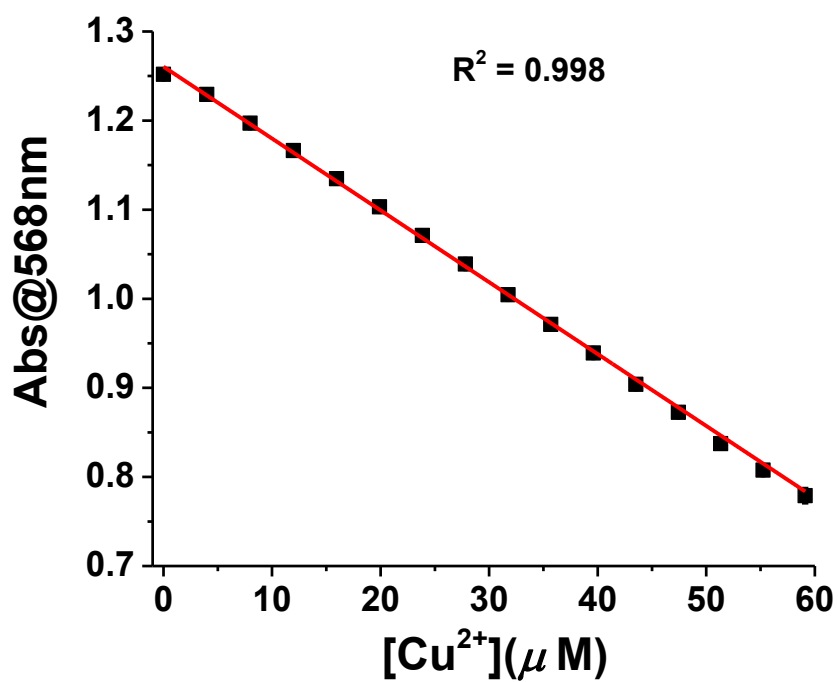

**Fig. S2** Linear best fit in the linear dynamic range (weight given by data error bars) for the titration of the  $40 \mu M$  solution of **1** in MeCN (absorbance at 568 nm as a function of the concentration of  $Cu^{2+}$  added).

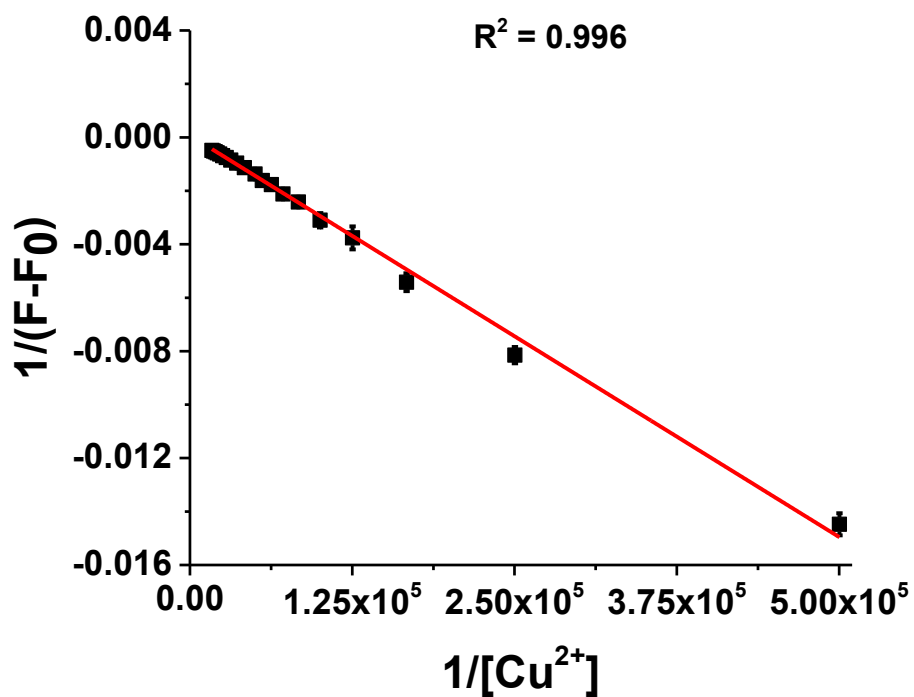

**Fig. S3** Benesi-Hildebrand plot (fluorescence intensity at 645 nm) for the calculation of the binding constant of **1** ( $40 \mu\text{M}$  solution in MeCN) with  $\text{Cu}^{2+}$ . Weight given by data error bars.

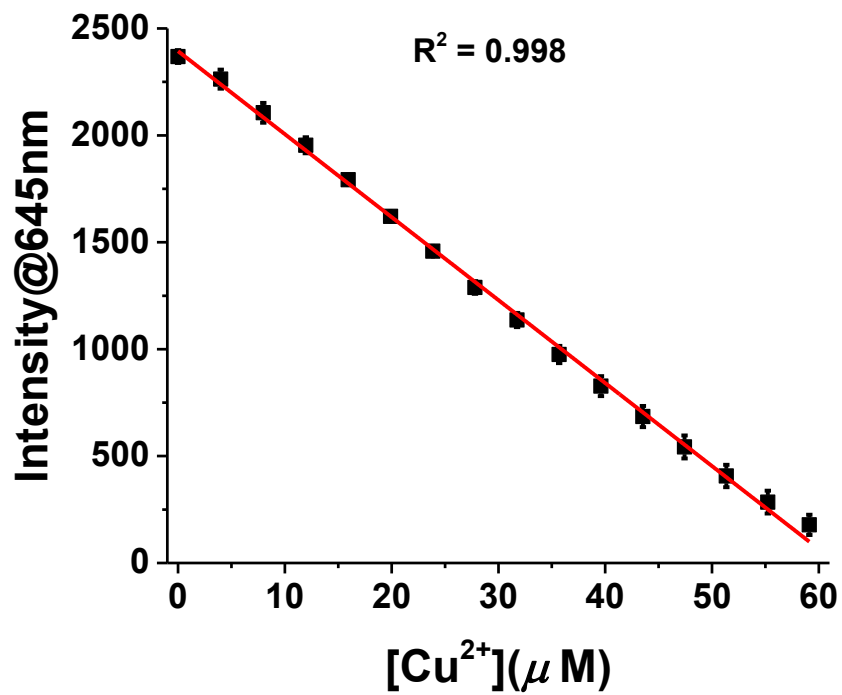

**Fig. S4** Linear best fit in the linear dynamic range (weight given by data error bars) for the titration of the 40 μM solution of **1** in MeCN (fluorescence intensity at 645 nm as a function of the concentration of Cu<sup>2+</sup> added).
